# Supplementary material for: Bovine colostrum derived-exosomes prevent dextran sulfate sodium-induced intestinal colitis via suppression of inflammation and oxidative stress
Source: Royal Society of Chemistry journal article supplement (doi:10.1039/d1bm01797g), 2022-01-01
Supplement: d1bm01797g1.pdf [file d1bm01797g1.pdf]

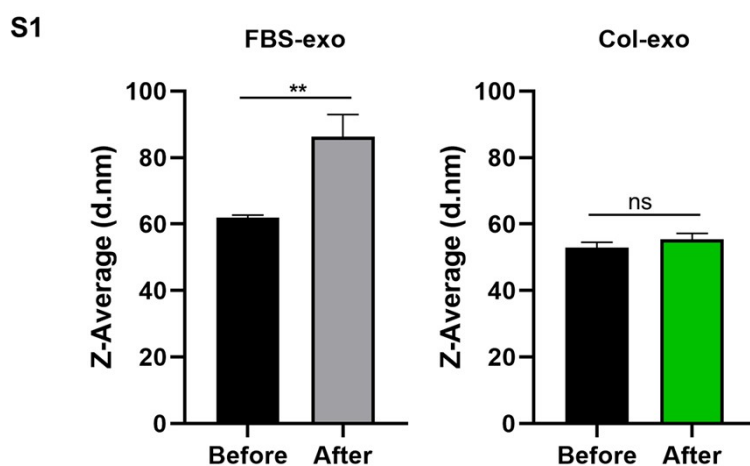

**Figure S1.** A comparison of the stability of FBS-exo and Col-exo to freeze-drying. The exosomes of each group were analyzed by measuring the size before and after freeze-drying using dynamic light scattering (DLS).  $n=3$ ; *ns* = not significant and  $**p<0.01$

S2

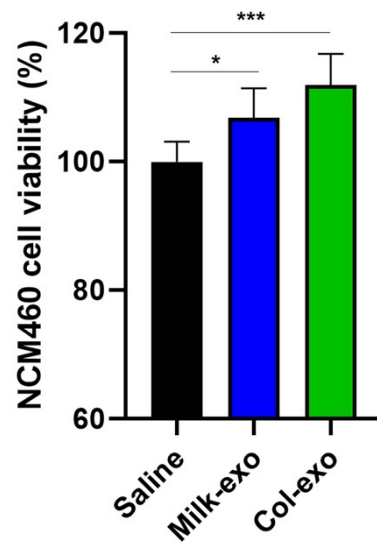

**Figure S2.** A comparison of growth rate of NCM460 cells treated with exosomes extracted from regular milk and colostrum. NCM460 cells were treated with each exosome at a concentration of 0.1 mg/ml for 24 h, and cell proliferation was measured using CCK-8 assay.  $n=6$ ; \* $p<0.05$  and \*\*\* $p<0.001$ .
